# Supplementary material for: First aryl-substituted acyclic imino-N-heterocyclic carbene ligand precursor: synthesis, characterisation and coordination with silver(i) and copper(i)
Source: Royal Society of Chemistry journal article supplement (doi:10.1039/c002234a), 2010-01-01
Supplement: c002234a.pdf [file c002234a.pdf]

Supplementary Material for:

**First Aryl-Substituted Acyclic Imino-*N*-Heterocyclic Carbene Ligand Precursor:  
Synthesis and Characterisation and Coordination with Silver(I) and Copper(I)**

5

by

Anna C. Badaj,<sup>a</sup> Sarim Dastgir,<sup>a</sup> Alan J. Lough,<sup>b</sup> Gino G. Lavoie<sup>\*a</sup>

<sup>a</sup>*Department of Chemistry, York University, 4700 Keele Street, Toronto,  
Ontario, M3J 1P3 (Canada);* <sup>b</sup>*Department of Chemistry, University of Toronto,*

10

*80 St George Street, Toronto, Ontario M5S 3H6 (Canada)*

**Table of Contents**

|    |                                                                                                                                                                  |          |
|----|------------------------------------------------------------------------------------------------------------------------------------------------------------------|----------|
|    | <u>CRYSTALLOGRAPHIC DATA</u>                                                                                                                                     | <u>2</u> |
| 15 | 1-(1-(2,6-Dimethylphenylimino)ethyl)-3-(2,4,6-trimethylphenyl)imidazolium<br>Chloride ( <b>1</b> ), C <sup>^</sup> imine·HCl                                     | 3        |
| 20 | Chloro[1-(1-(2,6-dimethylphenylimino)ethyl)-3-(2,4,6-trimethylphenyl)imidazol-2-<br>ylidene]silver(I), Ag(C <sup>^</sup> imine)Cl ( <b>2</b> )                   | 10       |
| 25 | Chlorobis[1-(1-(2,6-dimethylphenylimino)ethyl)-3-(2,4,6-trimethylphenyl)-<br>imidazol-2-ylidene]copper(I), Cu(C <sup>^</sup> imine) <sub>2</sub> Cl ( <b>3</b> ) | 19       |

## Crystallographic Data

X-Ray crystallographic data for **1–3** were collected on a Bruker-Nonius Kappa-CCD diffractometer using monochromated Mo-K $\alpha$  radiation ( $k = 0.71073 \text{ \AA}$ ) at 150K and were measured using a combination of  $\phi$  scans and  $\omega$  scans with  $\kappa$  offsets, to fill the Ewald sphere. Intensity data were processed using the Denzo-SMN package.<sup>3</sup> Absorption corrections were carried out using SORTAV.<sup>4</sup> The structure was solved and refined using SHELXTL V6.1<sup>5</sup> for full-matrix least-squares refinement that was based on  $F^2$ . All H atoms were included in calculated positions and allowed to refine in riding-motion approximation with  $U_{\text{iso}}$ -tied to the carrier atom. Crystallographic data for the compounds are given below.

**1-(1-(2,6-Dimethylphenylimino)ethyl)-3-(2,4,6-trimethylphenyl)imidazolium Chloride (1), C<sup>+</sup>imine·HCl**

**Table 1.** Crystal data and structure refinement for Compound 1.

|    |                                   |                                                                |                    |
|----|-----------------------------------|----------------------------------------------------------------|--------------------|
| 5  | CCDC Deposition Number            | 759030                                                         |                    |
|    | Identification code               | k09132                                                         |                    |
|    | Empirical formula                 | C <sub>23</sub> H <sub>28</sub> Cl <sub>3</sub> N <sub>3</sub> |                    |
|    | Formula weight                    | 452.83                                                         |                    |
|    | Temperature                       | 150(1) K                                                       |                    |
| 10 | Wavelength                        | 0.71073 Å                                                      |                    |
|    | Crystal system                    | Monoclinic                                                     |                    |
|    | Space group                       | P 21/c                                                         |                    |
|    | Unit cell dimensions              | a = 9.0219(2) Å                                                | a = 90°.           |
|    |                                   | b = 26.6329(7) Å                                               | b = 113.6980(14)°. |
| 15 |                                   | c = 10.7548(3) Å                                               | g = 90°.           |
|    | Volume                            | 2366.25(10) Å <sup>3</sup>                                     |                    |
|    | Z                                 | 4                                                              |                    |
|    | Density (calculated)              | 1.271 Mg/m <sup>3</sup>                                        |                    |
|    | Absorption coefficient            | 0.401 mm <sup>-1</sup>                                         |                    |
| 20 | F(000)                            | 952                                                            |                    |
|    | Crystal size                      | 0.30 x 0.22 x 0.12 mm <sup>3</sup>                             |                    |
|    | Theta range for data collection   | 2.57 to 25.00°.                                                |                    |
|    | Index ranges                      | -10 ≤ h ≤ 9, -31 ≤ k ≤ 31, -10 ≤ l ≤ 12                        |                    |
|    | Reflections collected             | 20220                                                          |                    |
| 25 | Independent reflections           | 4151 [R(int) = 0.1302]                                         |                    |
|    | Completeness to theta = 25.00°    | 99.6 %                                                         |                    |
|    | Absorption correction             | Semi-empirical from equivalents                                |                    |
|    | Max. and min. transmission        | 0.955 and 0.475                                                |                    |
|    | Refinement method                 | Full-matrix least-squares on F <sup>2</sup>                    |                    |
| 30 | Data / restraints / parameters    | 4151 / 0 / 268                                                 |                    |
|    | Goodness-of-fit on F <sup>2</sup> | 1.076                                                          |                    |
|    | Final R indices [I > 2σ(I)]       | R1 = 0.0582, wR2 = 0.1383                                      |                    |
|    | R indices (all data)              | R1 = 0.1043, wR2 = 0.1799                                      |                    |
| 35 | Largest diff. peak and hole       | 0.334 and -0.422 e.Å <sup>-3</sup>                             |                    |

**Table 2.** Atomic coordinates ( $\times 10^4$ ) and equivalent isotropic displacement parameters ( $\text{\AA}^2 \times 10^3$ ) for k09132. U(eq) is defined as one third of the trace of the orthogonalized  $U_{ij}$  tensor.

|    | x     | y       | z       | U(eq)   |       |
|----|-------|---------|---------|---------|-------|
| 5  |       |         |         |         |       |
|    | Cl(1) | 3966(1) | 4902(1) | 6914(1) | 36(1) |
|    | N(1)  | 1479(3) | 5418(1) | 3147(3) | 30(1) |
|    | N(2)  | 1637(3) | 4626(1) | 3587(3) | 28(1) |
| 10 | N(3)  | 1287(3) | 3817(1) | 4094(3) | 33(1) |
|    | C(1)  | 2445(4) | 5023(1) | 3414(4) | 29(1) |
|    | C(2)  | 90(4)   | 4776(1) | 3417(4) | 30(1) |
|    | C(3)  | -9(4)   | 5270(1) | 3142(4) | 32(1) |
|    | C(4)  | 2271(4) | 4123(1) | 3950(3) | 28(1) |
| 15 | C(5)  | 3964(4) | 4048(1) | 4108(4) | 36(1) |
|    | C(6)  | 1747(4) | 3303(1) | 4417(4) | 32(1) |
|    | C(7)  | 2602(4) | 3157(1) | 5768(4) | 36(1) |
|    | C(8)  | 2930(5) | 2643(1) | 6007(5) | 46(1) |
|    | C(9)  | 2418(5) | 2297(1) | 4967(4) | 45(1) |
| 20 | C(10) | 1532(5) | 2453(1) | 3651(4) | 42(1) |
|    | C(11) | 1170(4) | 2958(1) | 3351(4) | 36(1) |
|    | C(12) | 3132(5) | 3528(2) | 6923(4) | 50(1) |
|    | C(13) | 160(5)  | 3134(2) | 1931(4) | 50(1) |
|    | C(14) | 1867(4) | 5920(1) | 2841(4) | 30(1) |
| 25 | C(15) | 1989(4) | 6000(1) | 1609(4) | 32(1) |
|    | C(16) | 2322(4) | 6487(1) | 1330(4) | 35(1) |
|    | C(17) | 2510(4) | 6881(1) | 2228(4) | 35(1) |
|    | C(18) | 2405(4) | 6776(1) | 3461(4) | 36(1) |
|    | C(19) | 2086(4) | 6295(1) | 3797(4) | 30(1) |
| 30 | C(20) | 1793(5) | 5583(1) | 602(4)  | 41(1) |
|    | C(21) | 2783(5) | 7409(1) | 1860(4) | 46(1) |
|    | C(22) | 2004(5) | 6197(1) | 5142(4) | 38(1) |
|    | Cl(2) | 2423(1) | 4188(1) | 107(1)  | 54(1) |
|    | Cl(3) | 5649(1) | 3753(1) | 1068(1) | 54(1) |
| 35 | C(23) | 4441(5) | 4283(1) | 303(4)  | 45(1) |

**Table 3.** Bond lengths [ $\text{\AA}$ ] and angles [ $^\circ$ ] for k09132.

---

|    |                 |          |
|----|-----------------|----------|
|    | N(1)-C(1)       | 1.323(4) |
| 5  | N(1)-C(3)       | 1.398(4) |
|    | N(1)-C(14)      | 1.452(4) |
|    | N(2)-C(1)       | 1.338(4) |
|    | N(2)-C(2)       | 1.391(4) |
|    | N(2)-C(4)       | 1.447(4) |
| 10 | N(3)-C(4)       | 1.262(4) |
|    | N(3)-C(6)       | 1.432(4) |
|    | C(2)-C(3)       | 1.344(5) |
|    | C(4)-C(5)       | 1.480(5) |
|    | C(6)-C(11)      | 1.395(5) |
| 15 | C(6)-C(7)       | 1.399(5) |
|    | C(7)-C(8)       | 1.402(5) |
|    | C(7)-C(12)      | 1.506(5) |
|    | C(8)-C(9)       | 1.378(6) |
|    | C(9)-C(10)      | 1.381(6) |
| 20 | C(10)-C(11)     | 1.391(5) |
|    | C(11)-C(13)     | 1.505(5) |
|    | C(14)-C(15)     | 1.389(5) |
|    | C(14)-C(19)     | 1.390(5) |
|    | C(15)-C(16)     | 1.389(5) |
| 25 | C(15)-C(20)     | 1.513(5) |
|    | C(16)-C(17)     | 1.390(5) |
|    | C(17)-C(18)     | 1.395(5) |
|    | C(17)-C(21)     | 1.509(5) |
|    | C(18)-C(19)     | 1.393(5) |
| 30 | C(19)-C(22)     | 1.501(5) |
|    | Cl(2)-C(23)     | 1.765(4) |
|    | Cl(3)-C(23)     | 1.773(4) |
|    | C(1)-N(1)-C(3)  | 108.9(3) |
| 35 | C(1)-N(1)-C(14) | 125.8(3) |

|    |                   |          |
|----|-------------------|----------|
|    | C(3)-N(1)-C(14)   | 125.3(3) |
|    | C(1)-N(2)-C(2)    | 109.3(3) |
|    | C(1)-N(2)-C(4)    | 126.1(3) |
|    | C(2)-N(2)-C(4)    | 124.6(3) |
| 5  | C(4)-N(3)-C(6)    | 120.0(3) |
|    | N(1)-C(1)-N(2)    | 108.1(3) |
|    | C(3)-C(2)-N(2)    | 106.5(3) |
|    | C(2)-C(3)-N(1)    | 107.3(3) |
|    | N(3)-C(4)-N(2)    | 114.3(3) |
| 10 | N(3)-C(4)-C(5)    | 130.0(3) |
|    | N(2)-C(4)-C(5)    | 115.8(3) |
|    | C(11)-C(6)-C(7)   | 122.6(3) |
|    | C(11)-C(6)-N(3)   | 116.9(3) |
|    | C(7)-C(6)-N(3)    | 120.2(3) |
| 15 | C(6)-C(7)-C(8)    | 116.7(4) |
|    | C(6)-C(7)-C(12)   | 122.3(3) |
|    | C(8)-C(7)-C(12)   | 121.0(4) |
|    | C(9)-C(8)-C(7)    | 121.8(4) |
|    | C(8)-C(9)-C(10)   | 119.8(3) |
| 20 | C(9)-C(10)-C(11)  | 121.0(4) |
|    | C(10)-C(11)-C(6)  | 118.0(4) |
|    | C(10)-C(11)-C(13) | 121.8(4) |
|    | C(6)-C(11)-C(13)  | 120.2(3) |
|    | C(15)-C(14)-C(19) | 123.5(3) |
| 25 | C(15)-C(14)-N(1)  | 118.5(3) |
|    | C(19)-C(14)-N(1)  | 118.0(3) |
|    | C(16)-C(15)-C(14) | 117.2(3) |
|    | C(16)-C(15)-C(20) | 120.3(3) |
|    | C(14)-C(15)-C(20) | 122.5(3) |
| 30 | C(15)-C(16)-C(17) | 122.0(4) |
|    | C(16)-C(17)-C(18) | 118.3(3) |
|    | C(16)-C(17)-C(21) | 120.6(3) |
|    | C(18)-C(17)-C(21) | 121.0(3) |
|    | C(19)-C(18)-C(17) | 122.0(3) |
| 35 | C(14)-C(19)-C(18) | 116.9(3) |
|    | C(14)-C(19)-C(22) | 122.7(3) |

|                   |          |
|-------------------|----------|
| C(18)-C(19)-C(22) | 120.3(3) |
| Cl(2)-C(23)-Cl(3) | 110.7(2) |

---

Symmetry transformations used to generate equivalent atoms:

5

**Table 4.** Anisotropic displacement parameters ( $\text{\AA}^2 \times 10^3$ ) for k09132. The anisotropic displacement factor exponent takes the form:  $-2p^2 [ h^2 a^{*2} U^{11} + \dots + 2 h k a^* b^* U^{12} ]$

|    |       | U11   | U22   | U33   | U23   | U13   | U12   |
|----|-------|-------|-------|-------|-------|-------|-------|
| 5  | Cl(1) | 35(1) | 34(1) | 42(1) | -2(1) | 17(1) | -3(1) |
|    | N(1)  | 31(2) | 22(2) | 36(2) | 3(1)  | 12(1) | 1(1)  |
|    | N(2)  | 29(2) | 26(2) | 29(2) | 2(1)  | 11(1) | 0(1)  |
| 10 | N(3)  | 32(2) | 26(2) | 42(2) | 5(1)  | 17(2) | 0(1)  |
|    | C(1)  | 30(2) | 24(2) | 33(2) | 2(2)  | 13(2) | 0(2)  |
|    | C(2)  | 27(2) | 29(2) | 37(2) | 4(2)  | 15(2) | 1(2)  |
|    | C(3)  | 28(2) | 34(2) | 38(2) | 3(2)  | 18(2) | 3(2)  |
|    | C(4)  | 29(2) | 25(2) | 29(2) | 1(1)  | 11(2) | 2(2)  |
| 15 | C(5)  | 34(2) | 28(2) | 50(2) | 6(2)  | 20(2) | 5(2)  |
|    | C(6)  | 28(2) | 26(2) | 46(2) | 6(2)  | 18(2) | 2(2)  |
|    | C(7)  | 40(2) | 27(2) | 44(2) | 4(2)  | 20(2) | -1(2) |
|    | C(8)  | 44(2) | 34(2) | 56(3) | 12(2) | 15(2) | 8(2)  |
|    | C(9)  | 51(2) | 22(2) | 65(3) | 7(2)  | 26(2) | 5(2)  |
| 20 | C(10) | 48(2) | 29(2) | 53(3) | -4(2) | 25(2) | -3(2) |
|    | C(11) | 36(2) | 32(2) | 43(2) | -1(2) | 19(2) | 2(2)  |
|    | C(12) | 60(3) | 38(2) | 44(3) | 2(2)  | 12(2) | 0(2)  |
|    | C(13) | 53(3) | 46(2) | 47(3) | -5(2) | 15(2) | 0(2)  |
|    | C(14) | 26(2) | 24(2) | 37(2) | 6(2)  | 10(2) | 4(1)  |
| 25 | C(15) | 32(2) | 29(2) | 34(2) | 2(2)  | 11(2) | 3(2)  |
|    | C(16) | 37(2) | 32(2) | 35(2) | 8(2)  | 13(2) | 2(2)  |
|    | C(17) | 37(2) | 24(2) | 43(2) | 5(2)  | 14(2) | 2(2)  |
|    | C(18) | 39(2) | 28(2) | 40(2) | -1(2) | 15(2) | 6(2)  |
|    | C(19) | 32(2) | 29(2) | 32(2) | 2(2)  | 13(2) | 4(2)  |
| 30 | C(20) | 49(2) | 34(2) | 39(2) | -2(2) | 17(2) | -4(2) |
|    | C(21) | 56(3) | 31(2) | 49(3) | 5(2)  | 19(2) | -1(2) |
|    | C(22) | 45(2) | 33(2) | 41(2) | 4(2)  | 22(2) | 4(2)  |
|    | Cl(2) | 48(1) | 47(1) | 63(1) | 6(1)  | 17(1) | 5(1)  |
|    | Cl(3) | 53(1) | 55(1) | 57(1) | 3(1)  | 24(1) | 11(1) |
| 35 | C(23) | 53(3) | 38(2) | 47(3) | -2(2) | 22(2) | -8(2) |



**Table 5.** Hydrogen coordinates (  $\times 10^4$ ) and isotropic displacement parameters ( $\text{\AA}^2 \times 10^3$ ) for k09132.

|    | x      | y    | z    | U(eq) |    |
|----|--------|------|------|-------|----|
| 5  |        |      |      |       |    |
|    | H(1A)  | 3524 | 5020 | 3473  | 35 |
|    | H(2A)  | -734 | 4569 | 3483  | 36 |
| 10 | H(3A)  | -921 | 5480 | 2976  | 38 |
|    | H(5A)  | 4229 | 3690 | 4227  | 54 |
|    | H(5B)  | 4696 | 4234 | 4905  | 54 |
|    | H(5C)  | 4087 | 4171 | 3296  | 54 |
|    | H(8A)  | 3521 | 2531 | 6911  | 56 |
| 15 | H(9A)  | 2673 | 1951 | 5156  | 54 |
|    | H(10A) | 1164 | 2212 | 2940  | 50 |
|    | H(12A) | 3762 | 3796 | 6744  | 75 |
|    | H(12B) | 3802 | 3356 | 7769  | 75 |
|    | H(12C) | 2177 | 3672 | 7008  | 75 |
| 20 | H(13A) | -753 | 3333 | 1932  | 76 |
|    | H(13B) | -249 | 2843 | 1333  | 76 |
|    | H(13C) | 825  | 3342 | 1601  | 76 |
|    | H(16A) | 2423 | 6552 | 499   | 42 |
|    | H(18A) | 2556 | 7042 | 4091  | 43 |
| 25 | H(20A) | 881  | 5368 | 536   | 61 |
|    | H(20B) | 2785 | 5381 | 909   | 61 |
|    | H(20C) | 1585 | 5727 | -290  | 61 |
|    | H(21A) | 3332 | 7605 | 2691  | 69 |
|    | H(21B) | 1739 | 7565 | 1313  | 69 |
| 30 | H(21C) | 3456 | 7401 | 1337  | 69 |
|    | H(22A) | 2535 | 6472 | 5769  | 57 |
|    | H(22B) | 2554 | 5880 | 5517  | 57 |
|    | H(22C) | 869  | 6175 | 5019  | 57 |
|    | H(23A) | 4889 | 4583 | 874   | 55 |
| 35 | H(23B) | 4465 | 4344 | -597  | 55 |

**Chloro[1-(1-(2,6-dimethylphenylimino)ethyl)-3-(2,4,6-trimethylphenyl)imidazol-2-ylidene]silver(I), Ag(C<sup>^</sup>imine)Cl (2)**

**Table 6.** Crystal data and structure refinement for Compound 2.

|    |                                   |                                                                   |          |
|----|-----------------------------------|-------------------------------------------------------------------|----------|
| 5  | CCDC Deposition Number            | 759031                                                            |          |
|    | Identification code               | k09165                                                            |          |
|    | Empirical formula                 | C <sub>23</sub> H <sub>27</sub> Ag Cl <sub>3</sub> N <sub>3</sub> |          |
|    | Formula weight                    | 559.70                                                            |          |
|    | Temperature                       | 150(2) K                                                          |          |
| 10 | Wavelength                        | 0.71073 Å                                                         |          |
|    | Crystal system                    | Orthorhombic                                                      |          |
|    | Space group                       | P 21 21 21                                                        |          |
|    | Unit cell dimensions              | a = 9.1037(2) Å                                                   | a = 90°. |
|    |                                   | b = 15.7675(3) Å                                                  | b = 90°. |
| 15 |                                   | c = 17.1993(3) Å                                                  | g = 90°. |
|    | Volume                            | 2468.83(8) Å <sup>3</sup>                                         |          |
|    | Z                                 | 4                                                                 |          |
|    | Density (calculated)              | 1.506 Mg/m <sup>3</sup>                                           |          |
|    | Absorption coefficient            | 1.156 mm <sup>-1</sup>                                            |          |
| 20 | F(000)                            | 1136                                                              |          |
|    | Crystal size                      | 0.30 x 0.26 x 0.22 mm <sup>3</sup>                                |          |
|    | Theta range for data collection   | 2.58 to 27.49°.                                                   |          |
|    | Index ranges                      | -11<=h<=11, -20<=k<=20, -22<=l<=22                                |          |
|    | Reflections collected             | 22758                                                             |          |
| 25 | Independent reflections           | 5650 [R(int) = 0.0371]                                            |          |
|    | Completeness to theta = 27.49°    | 99.8 %                                                            |          |
|    | Absorption correction             | Semi-empirical from equivalents                                   |          |
|    | Max. and min. transmission        | 0.773 and 0.724                                                   |          |
|    | Refinement method                 | Full-matrix least-squares on F <sup>2</sup>                       |          |
| 30 | Data / restraints / parameters    | 5650 / 6 / 305                                                    |          |
|    | Goodness-of-fit on F <sup>2</sup> | 1.075                                                             |          |
|    | Final R indices [I>2sigma(I)]     | R1 = 0.0349, wR2 = 0.0770                                         |          |
|    | R indices (all data)              | R1 = 0.0439, wR2 = 0.0824                                         |          |
|    | Absolute structure parameter      | -0.08(3)                                                          |          |
| 35 | Largest diff. peak and hole       | 1.169 and -0.560 e.Å <sup>-3</sup>                                |          |

**Table 7.** Atomic coordinates ( $\times 10^4$ ) and equivalent isotropic displacement parameters ( $\text{\AA}^2 \times 10^3$ ) for k09165. U(eq) is defined as one third of the trace of the orthogonalized  $U_{ij}$  tensor.

|    | x     | y        | z       | U(eq)    |        |
|----|-------|----------|---------|----------|--------|
| 5  |       |          |         |          |        |
|    | Ag(1) | 6348(1)  | 8051(1) | 6550(1)  | 29(1)  |
|    | Cl(1) | 6751(1)  | 9474(1) | 6239(1)  | 35(1)  |
|    | N(1)  | 5688(3)  | 6407(2) | 7448(2)  | 27(1)  |
| 10 | N(2)  | 5953(3)  | 6117(2) | 6242(2)  | 30(1)  |
|    | N(3)  | 5628(4)  | 7662(2) | 8132(2)  | 30(1)  |
|    | C(1)  | 5998(4)  | 6770(2) | 6751(2)  | 28(1)  |
|    | C(2)  | 5604(4)  | 5358(2) | 6617(2)  | 32(1)  |
|    | C(3)  | 5448(4)  | 5537(2) | 7366(2)  | 33(1)  |
| 15 | C(4)  | 5647(4)  | 6863(2) | 8173(2)  | 27(1)  |
|    | C(5)  | 5653(5)  | 6313(2) | 8882(2)  | 38(1)  |
|    | C(6)  | 5616(4)  | 8167(2) | 8821(2)  | 30(1)  |
|    | C(7)  | 4349(5)  | 8244(2) | 9271(2)  | 34(1)  |
|    | C(8)  | 4397(5)  | 8803(3) | 9907(2)  | 40(1)  |
| 20 | C(9)  | 5651(5)  | 9261(2) | 10080(2) | 42(1)  |
|    | C(10) | 6891(5)  | 9180(2) | 9627(2)  | 39(1)  |
|    | C(11) | 6893(5)  | 8633(2) | 8983(2)  | 36(1)  |
|    | C(12) | 2954(5)  | 7787(3) | 9079(2)  | 44(1)  |
|    | C(13) | 8251(5)  | 8538(3) | 8488(3)  | 54(1)  |
| 25 | C(14) | 6207(4)  | 6195(2) | 5410(2)  | 28(1)  |
|    | C(15) | 5120(4)  | 6544(2) | 4946(2)  | 32(1)  |
|    | C(16) | 5409(5)  | 6602(3) | 4147(2)  | 36(1)  |
|    | C(17) | 6697(5)  | 6304(3) | 3826(2)  | 39(1)  |
|    | C(18) | 7756(5)  | 5959(3) | 4313(2)  | 37(1)  |
| 30 | C(19) | 7536(4)  | 5895(2) | 5111(2)  | 34(1)  |
|    | C(20) | 3668(4)  | 6820(2) | 5269(2)  | 36(1)  |
|    | C(21) | 6995(6)  | 6387(4) | 2963(2)  | 61(1)  |
|    | C(22) | 8713(5)  | 5530(3) | 5627(2)  | 47(1)  |
|    | Cl(2) | 5759(8)  | 3720(5) | 2835(4)  | 74(2)  |
| 35 | Cl(3) | 3205(11) | 3577(9) | 2078(6)  | 106(3) |

|        |          |          |          |         |
|--------|----------|----------|----------|---------|
| C(24)  | 4180(13) | 4293(13) | 2642(14) | 109(11) |
| CI(2A) | 5866(8)  | 4140(13) | 2846(4)  | 112(4)  |
| CI(3A) | 3131(7)  | 3969(7)  | 1969(4)  | 71(2)   |
| C(24A) | 3968(9)  | 4106(15) | 2865(8)  | 53(4)   |

---

5

**Table 8.** Bond lengths [Å] and angles [°] for k09165.

---

|    |               |           |
|----|---------------|-----------|
|    | Ag(1)-C(1)    | 2.074(3)  |
|    | Ag(1)-Cl(1)   | 2.3346(9) |
| 5  | N(1)-C(1)     | 1.359(4)  |
|    | N(1)-C(3)     | 1.397(5)  |
|    | N(1)-C(4)     | 1.439(4)  |
|    | N(2)-C(1)     | 1.352(4)  |
|    | N(2)-C(2)     | 1.397(4)  |
| 10 | N(2)-C(14)    | 1.455(4)  |
|    | N(3)-C(4)     | 1.263(5)  |
|    | N(3)-C(6)     | 1.426(4)  |
|    | C(2)-C(3)     | 1.327(5)  |
|    | C(4)-C(5)     | 1.497(5)  |
| 15 | C(6)-C(7)     | 1.395(5)  |
|    | C(6)-C(11)    | 1.403(5)  |
|    | C(7)-C(8)     | 1.404(5)  |
|    | C(7)-C(12)    | 1.497(6)  |
|    | C(8)-C(9)     | 1.383(6)  |
| 20 | C(9)-C(10)    | 1.378(6)  |
|    | C(10)-C(11)   | 1.403(5)  |
|    | C(11)-C(13)   | 1.509(6)  |
|    | C(14)-C(15)   | 1.385(5)  |
|    | C(14)-C(19)   | 1.397(5)  |
| 25 | C(15)-C(16)   | 1.402(5)  |
|    | C(15)-C(20)   | 1.499(6)  |
|    | C(16)-C(17)   | 1.378(6)  |
|    | C(17)-C(18)   | 1.388(6)  |
|    | C(17)-C(21)   | 1.516(5)  |
| 30 | C(18)-C(19)   | 1.390(5)  |
|    | C(19)-C(22)   | 1.506(6)  |
|    | Cl(2)-C(24)   | 1.731(8)  |
|    | Cl(3)-C(24)   | 1.733(8)  |
|    | Cl(2A)-C(24A) | 1.729(8)  |
| 35 | Cl(3A)-C(24A) | 1.733(8)  |

|    |                   |           |
|----|-------------------|-----------|
|    | C(1)-Ag(1)-Cl(1)  | 176.29(9) |
|    | C(1)-N(1)-C(3)    | 110.9(3)  |
|    | C(1)-N(1)-C(4)    | 124.0(3)  |
| 5  | C(3)-N(1)-C(4)    | 125.1(3)  |
|    | C(1)-N(2)-C(2)    | 111.2(3)  |
|    | C(1)-N(2)-C(14)   | 124.6(3)  |
|    | C(2)-N(2)-C(14)   | 124.2(3)  |
|    | C(4)-N(3)-C(6)    | 120.7(3)  |
| 10 | N(2)-C(1)-N(1)    | 104.1(3)  |
|    | N(2)-C(1)-Ag(1)   | 129.7(2)  |
|    | N(1)-C(1)-Ag(1)   | 126.1(2)  |
|    | C(3)-C(2)-N(2)    | 106.8(3)  |
|    | C(2)-C(3)-N(1)    | 106.9(3)  |
| 15 | N(3)-C(4)-N(1)    | 116.8(3)  |
|    | N(3)-C(4)-C(5)    | 128.5(3)  |
|    | N(1)-C(4)-C(5)    | 114.7(3)  |
|    | C(7)-C(6)-C(11)   | 121.9(3)  |
|    | C(7)-C(6)-N(3)    | 121.1(3)  |
| 20 | C(11)-C(6)-N(3)   | 116.8(3)  |
|    | C(6)-C(7)-C(8)    | 117.5(4)  |
|    | C(6)-C(7)-C(12)   | 122.4(3)  |
|    | C(8)-C(7)-C(12)   | 120.1(4)  |
|    | C(9)-C(8)-C(7)    | 121.4(4)  |
| 25 | C(10)-C(9)-C(8)   | 120.4(3)  |
|    | C(9)-C(10)-C(11)  | 120.3(4)  |
|    | C(10)-C(11)-C(6)  | 118.5(4)  |
|    | C(10)-C(11)-C(13) | 120.5(4)  |
|    | C(6)-C(11)-C(13)  | 121.0(3)  |
| 30 | C(15)-C(14)-C(19) | 122.7(3)  |
|    | C(15)-C(14)-N(2)  | 119.2(3)  |
|    | C(19)-C(14)-N(2)  | 118.1(3)  |
|    | C(14)-C(15)-C(16) | 117.2(4)  |
|    | C(14)-C(15)-C(20) | 122.1(3)  |
| 35 | C(16)-C(15)-C(20) | 120.6(4)  |
|    | C(17)-C(16)-C(15) | 121.9(4)  |

|   |                      |           |
|---|----------------------|-----------|
|   | C(16)-C(17)-C(18)    | 118.9(3)  |
|   | C(16)-C(17)-C(21)    | 121.0(4)  |
|   | C(18)-C(17)-C(21)    | 120.1(4)  |
|   | C(17)-C(18)-C(19)    | 121.6(4)  |
| 5 | C(18)-C(19)-C(14)    | 117.6(4)  |
|   | C(18)-C(19)-C(22)    | 120.4(4)  |
|   | C(14)-C(19)-C(22)    | 121.9(3)  |
|   | Cl(2)-C(24)-Cl(3)    | 101.1(11) |
|   | Cl(2A)-C(24A)-Cl(3A) | 115.2(8)  |

10

---

Symmetry transformations used to generate equivalent atoms:

**Table 9.** Anisotropic displacement parameters ( $\text{\AA}^2 \times 10^3$ ) for k09165. The anisotropic displacement factor exponent takes the form:  $-2p^2 [ h^2 a^{*2} U^{11} + \dots + 2 h k a^* b^* U^{12} ]$

|    |       | U11    | U22     | U33     | U23     | U13    | U12    |
|----|-------|--------|---------|---------|---------|--------|--------|
| 5  | Ag(1) | 35(1)  | 26(1)   | 28(1)   | 0(1)    | 2(1)   | -3(1)  |
|    | Cl(1) | 40(1)  | 27(1)   | 37(1)   | 0(1)    | 6(1)   | -3(1)  |
|    | N(1)  | 36(2)  | 24(1)   | 22(1)   | 2(1)    | -1(1)  | -3(1)  |
|    | N(2)  | 36(2)  | 28(1)   | 25(1)   | -4(1)   | 6(1)   | -7(1)  |
| 10 | N(3)  | 35(2)  | 33(2)   | 23(1)   | -2(1)   | 1(1)   | -2(1)  |
|    | C(1)  | 28(2)  | 30(2)   | 26(2)   | -2(1)   | -1(1)  | -1(1)  |
|    | C(2)  | 41(2)  | 24(2)   | 31(2)   | 2(2)    | -3(2)  | -7(2)  |
|    | C(3)  | 43(2)  | 26(2)   | 29(2)   | 0(1)    | -3(2)  | -5(2)  |
|    | C(4)  | 27(2)  | 32(2)   | 22(1)   | -4(1)   | -2(1)  | -2(2)  |
| 15 | C(5)  | 55(3)  | 32(2)   | 25(2)   | 1(2)    | -6(2)  | -2(2)  |
|    | C(6)  | 42(2)  | 27(2)   | 22(2)   | 1(1)    | 0(2)   | 0(2)   |
|    | C(7)  | 42(2)  | 37(2)   | 24(2)   | 3(1)    | -1(2)  | -3(2)  |
|    | C(8)  | 57(3)  | 40(2)   | 22(2)   | 1(2)    | 5(2)   | 8(2)   |
|    | C(9)  | 71(3)  | 32(2)   | 21(2)   | -2(2)   | -6(2)  | 0(2)   |
| 20 | C(10) | 51(2)  | 31(2)   | 35(2)   | 0(2)    | -9(2)  | -1(2)  |
|    | C(11) | 44(2)  | 33(2)   | 30(2)   | 0(2)    | -4(2)  | -2(2)  |
|    | C(12) | 46(2)  | 51(2)   | 34(2)   | 0(2)    | 5(2)   | -5(2)  |
|    | C(13) | 48(3)  | 61(3)   | 54(3)   | -14(2)  | 2(2)   | -14(2) |
|    | C(14) | 37(2)  | 27(2)   | 21(2)   | -5(1)   | 0(2)   | -6(2)  |
| 25 | C(15) | 35(2)  | 30(2)   | 30(2)   | -1(2)   | -3(2)  | -2(2)  |
|    | C(16) | 38(2)  | 41(2)   | 29(2)   | 1(2)    | -4(2)  | -2(2)  |
|    | C(17) | 43(3)  | 47(2)   | 26(2)   | -3(2)   | 4(2)   | -5(2)  |
|    | C(18) | 36(2)  | 41(2)   | 34(2)   | -7(2)   | 6(2)   | -2(2)  |
|    | C(19) | 35(2)  | 32(2)   | 33(2)   | -4(2)   | 0(2)   | 1(2)   |
| 30 | C(20) | 34(2)  | 44(2)   | 30(2)   | -3(2)   | -4(2)  | 4(2)   |
|    | C(21) | 62(3)  | 90(4)   | 30(2)   | 5(2)    | 9(2)   | -3(3)  |
|    | C(22) | 44(2)  | 57(2)   | 40(2)   | 2(2)    | -3(2)  | 10(2)  |
|    | Cl(2) | 47(3)  | 112(4)  | 64(2)   | 0(2)    | -16(2) | 33(3)  |
|    | Cl(3) | 83(4)  | 135(6)  | 100(4)  | -34(4)  | -12(3) | -37(4) |
| 35 | C(24) | 71(11) | 150(20) | 111(16) | -73(16) | 20(10) | 24(11) |



|        |       |         |       |        |        |        |
|--------|-------|---------|-------|--------|--------|--------|
| CI(2A) | 50(3) | 234(11) | 53(2) | -25(5) | 6(2)   | -44(5) |
| CI(3A) | 37(2) | 127(6)  | 49(2) | -9(3)  | -10(1) | 5(3)   |
| C(24A) | 25(6) | 98(10)  | 36(5) | -19(6) | 1(5)   | 6(6)   |

---

**Table 10.** Hydrogen coordinates (  $\times 10^4$ ) and isotropic displacement parameters ( $\text{\AA}^2 \times 10^3$ ) for k09165.

|    | x      | y    | z    | U(eq) |     |
|----|--------|------|------|-------|-----|
| 5  |        |      |      |       |     |
|    | H(2A)  | 5499 | 4816 | 6380  | 39  |
|    | H(3A)  | 5217 | 5147 | 7769  | 39  |
|    | H(5A)  | 5698 | 6671 | 9348  | 56  |
| 10 | H(5B)  | 6510 | 5938 | 8869  | 56  |
|    | H(5C)  | 4754 | 5972 | 8895  | 56  |
|    | H(8A)  | 3550 | 8867 | 10224 | 47  |
|    | H(9A)  | 5657 | 9634 | 10513 | 50  |
|    | H(10A) | 7748 | 9495 | 9750  | 47  |
| 15 | H(12A) | 2917 | 7676 | 8518  | 66  |
|    | H(12B) | 2112 | 8137 | 9229  | 66  |
|    | H(12C) | 2922 | 7248 | 9362  | 66  |
|    | H(13A) | 8013 | 8675 | 7947  | 82  |
|    | H(13B) | 8608 | 7953 | 8519  | 82  |
| 20 | H(13C) | 9014 | 8925 | 8676  | 82  |
|    | H(16A) | 4696 | 6854 | 3817  | 43  |
|    | H(18A) | 8652 | 5761 | 4096  | 44  |
|    | H(20A) | 3825 | 7131 | 5755  | 54  |
|    | H(20B) | 3057 | 6320 | 5370  | 54  |
| 25 | H(20C) | 3173 | 7189 | 4892  | 54  |
|    | H(21A) | 6131 | 6630 | 2705  | 91  |
|    | H(21B) | 7202 | 5826 | 2744  | 91  |
|    | H(21C) | 7843 | 6759 | 2881  | 91  |
|    | H(22A) | 9647 | 5516 | 5344  | 71  |
| 30 | H(22B) | 8439 | 4953 | 5781  | 71  |
|    | H(22C) | 8819 | 5885 | 6092  | 71  |
|    | H(24A) | 4399 | 4820 | 2352  | 131 |
|    | H(24B) | 3644 | 4437 | 3126  | 131 |
|    | H(24C) | 3603 | 4641 | 3097  | 64  |
| 35 | H(24D) | 3661 | 3636 | 3211  | 64  |

**Chlorobis[1-(1-(2,6-dimethylphenylimino)ethyl)-3-(2,4,6-trimethylphenyl)-imidazol-2-ylidene]copper(I), Cu(C<sup>^</sup>imine)<sub>2</sub>Cl (3)**

**Table 11.** Crystal data and structure refinement for Compound 3.

|    |                                   |                                                                  |                  |
|----|-----------------------------------|------------------------------------------------------------------|------------------|
| 5  | CCDC Deposition Number            | 759032                                                           |                  |
|    | Identification code               | k09221                                                           |                  |
|    | Empirical formula                 | C <sub>47</sub> H <sub>56</sub> Cl <sub>7</sub> CuN <sub>6</sub> |                  |
|    | Formula weight                    | 1016.67                                                          |                  |
|    | Temperature                       | 150(1) K                                                         |                  |
| 10 | Wavelength                        | 0.71073 Å                                                        |                  |
|    | Crystal system                    | Triclinic                                                        |                  |
|    | Space group                       | P -1                                                             |                  |
|    | Unit cell dimensions              | a = 11.1810(3) Å                                                 | a = 98.178(2)°.  |
|    |                                   | b = 11.2363(3) Å                                                 | b = 90.697(2)°.  |
| 15 |                                   | c = 24.0984(9) Å                                                 | g = 116.143(2)°. |
|    | Volume                            | 2680.63(14) Å <sup>3</sup>                                       |                  |
|    | Z                                 | 2                                                                |                  |
|    | Density (calculated)              | 1.260 Mg/m <sup>3</sup>                                          |                  |
|    | Absorption coefficient            | 0.792 mm <sup>-1</sup>                                           |                  |
| 20 | F(000)                            | 1056                                                             |                  |
|    | Crystal size                      | 0.40 x 0.18 x 0.14 mm <sup>3</sup>                               |                  |
|    | Theta range for data collection   | 2.55 to 25.00°.                                                  |                  |
|    | Index ranges                      | -13<=h<=13, -13<=k<=13, -28<=l<=28                               |                  |
|    | Reflections collected             | 24919                                                            |                  |
| 25 | Independent reflections           | 9381 [R(int) = 0.063]                                            |                  |
|    | Completeness to theta = 25.00°    | 99.4 %                                                           |                  |
|    | Absorption correction             | Semi-empirical from equivalents                                  |                  |
|    | Max. and min. transmission        | 0.695 and 0.566                                                  |                  |
|    | Refinement method                 | Full-matrix least-squares on F <sup>2</sup>                      |                  |
| 30 | Data / restraints / parameters    | 9381 / 0 / 561                                                   |                  |
|    | Goodness-of-fit on F <sup>2</sup> | 1.082                                                            |                  |
|    | Final R indices [I>2sigma(I)]     | R1 = 0.0582, wR2 = 0.1631                                        |                  |
|    | R indices (all data)              | R1 = 0.0775, wR2 = 0.1759                                        |                  |
| 35 | Largest diff. peak and hole       | 1.091 and -1.022 e.Å <sup>-3</sup>                               |                  |

**Table 12.** Atomic coordinates ( $\times 10^4$ ) and equivalent isotropic displacement parameters ( $\text{\AA}^2 \times 10^3$ ) for k09221. U(eq) is defined as one third of the trace of the orthogonalized  $U_{ij}$  tensor.

|    |       | x        | y        | z       | U(eq) |
|----|-------|----------|----------|---------|-------|
| 5  |       |          |          |         |       |
|    | Cu(1) | 7555(1)  | 4858(1)  | 2495(1) | 28(1) |
|    | Cl(1) | 8952(1)  | 3723(1)  | 2287(1) | 43(1) |
|    | N(1)  | 5115(3)  | 3404(3)  | 1747(1) | 28(1) |
| 10 | N(2)  | 4864(3)  | 2397(3)  | 2455(1) | 27(1) |
|    | N(3)  | 4007(3)  | 996(3)   | 3098(1) | 30(1) |
|    | N(4)  | 9245(3)  | 7090(3)  | 3369(1) | 30(1) |
|    | N(5)  | 9905(3)  | 7634(3)  | 2572(1) | 27(1) |
|    | N(6)  | 11075(3) | 8631(3)  | 1864(1) | 33(1) |
| 15 | C(1)  | 5746(3)  | 3514(3)  | 2246(2) | 26(1) |
|    | C(2)  | 3735(3)  | 1625(3)  | 2076(2) | 32(1) |
|    | C(3)  | 3892(3)  | 2249(3)  | 1634(2) | 33(1) |
|    | C(4)  | 5608(3)  | 4326(3)  | 1351(2) | 29(1) |
|    | C(5)  | 6212(3)  | 3992(4)  | 890(2)  | 32(1) |
| 20 | C(6)  | 6620(4)  | 4854(4)  | 497(2)  | 40(1) |
|    | C(7)  | 6455(4)  | 6023(4)  | 559(2)  | 40(1) |
|    | C(8)  | 5892(4)  | 6337(4)  | 1029(2) | 40(1) |
|    | C(9)  | 5439(3)  | 5498(4)  | 1440(2) | 33(1) |
|    | C(10) | 6418(4)  | 2735(4)  | 827(2)  | 45(1) |
| 25 | C(11) | 6929(5)  | 6959(5)  | 122(2)  | 60(1) |
|    | C(12) | 4819(4)  | 5854(4)  | 1942(2) | 42(1) |
|    | C(13) | 5010(3)  | 2008(3)  | 2982(1) | 26(1) |
|    | C(14) | 6310(3)  | 2837(4)  | 3327(2) | 36(1) |
|    | C(15) | 3976(3)  | 488(3)   | 3608(2) | 29(1) |
| 30 | C(16) | 4084(4)  | -713(4)  | 3586(2) | 36(1) |
|    | C(17) | 3899(4)  | -1298(4) | 4072(2) | 39(1) |
|    | C(18) | 3594(4)  | -731(4)  | 4558(2) | 42(1) |
|    | C(19) | 3473(4)  | 449(4)   | 4572(2) | 40(1) |
|    | C(20) | 3656(3)  | 1072(4)  | 4099(2) | 35(1) |
| 35 | C(21) | 4350(5)  | -1373(4) | 3052(2) | 56(1) |

|    |       |          |         |         |        |
|----|-------|----------|---------|---------|--------|
|    | C(22) | 3487(4)  | 2342(4) | 4114(2) | 45(1)  |
|    | C(23) | 8925(3)  | 6629(3) | 2810(2) | 28(1)  |
|    | C(24) | 10795(3) | 8673(3) | 2982(2) | 33(1)  |
|    | C(25) | 10380(3) | 8326(3) | 3480(2) | 35(1)  |
| 5  | C(26) | 8584(3)  | 6350(3) | 3804(2) | 29(1)  |
|    | C(27) | 9132(3)  | 5601(3) | 4023(2) | 32(1)  |
|    | C(28) | 8505(4)  | 4913(4) | 4461(2) | 35(1)  |
|    | C(29) | 7382(4)  | 4974(4) | 4670(2) | 34(1)  |
|    | C(30) | 6863(4)  | 5722(4) | 4437(2) | 36(1)  |
| 10 | C(31) | 7450(3)  | 6431(3) | 4006(2) | 32(1)  |
|    | C(32) | 10333(4) | 5503(4) | 3794(2) | 44(1)  |
|    | C(33) | 6707(4)  | 4193(4) | 5135(2) | 47(1)  |
|    | C(34) | 6855(4)  | 7234(4) | 3749(2) | 48(1)  |
|    | C(35) | 10077(3) | 7634(3) | 1986(2) | 28(1)  |
| 15 | C(36) | 9073(3)  | 6463(4) | 1589(2) | 35(1)  |
|    | C(37) | 11404(3) | 8765(4) | 1298(2) | 34(1)  |
|    | C(38) | 10868(4) | 9408(4) | 987(2)  | 41(1)  |
|    | C(39) | 11377(4) | 9718(4) | 472(2)  | 50(1)  |
|    | C(40) | 12360(5) | 9382(5) | 270(2)  | 54(1)  |
| 20 | C(41) | 12850(4) | 8731(5) | 582(2)  | 51(1)  |
|    | C(42) | 12370(4) | 8396(4) | 1094(2) | 42(1)  |
|    | C(43) | 12900(5) | 7671(5) | 1430(2) | 59(1)  |
|    | C(44) | 9798(5)  | 9756(5) | 1209(2) | 54(1)  |
|    | CI(7) | 10210(2) | 4402(2) | 525(1)  | 87(1)  |
| 25 | CI(6) | 11554(2) | 3367(2) | 1214(1) | 84(1)  |
|    | CI(2) | 11043(1) | 1978(1) | 2855(1) | 82(1)  |
|    | CI(3) | 13120(1) | 4694(1) | 3261(1) | 63(1)  |
|    | C(1S) | 11903(4) | 3603(5) | 2717(2) | 56(1)  |
|    | CI(4) | 6468(2)  | 39(1)   | 1709(1) | 107(1) |
| 30 | CI(5) | 7759(1)  | -964(1) | 2442(1) | 59(1)  |
|    | C(2S) | 7647(5)  | 445(5)  | 2259(3) | 66(1)  |
|    | C(3S) | 10009(5) | 3224(5) | 957(2)  | 62(1)  |

---

**Table 13.** Bond lengths [Å] and angles [°] for k09221.

---

|    |             |            |
|----|-------------|------------|
|    | Cu(1)-C(23) | 1.933(3)   |
|    | Cu(1)-C(1)  | 1.937(3)   |
| 5  | Cu(1)-Cl(1) | 2.4313(10) |
|    | N(1)-C(1)   | 1.350(4)   |
|    | N(1)-C(3)   | 1.399(4)   |
|    | N(1)-C(4)   | 1.441(4)   |
|    | N(2)-C(1)   | 1.379(4)   |
| 10 | N(2)-C(2)   | 1.401(4)   |
|    | N(2)-C(13)  | 1.431(4)   |
|    | N(3)-C(13)  | 1.266(4)   |
|    | N(3)-C(15)  | 1.420(4)   |
|    | N(4)-C(23)  | 1.355(5)   |
| 15 | N(4)-C(25)  | 1.394(4)   |
|    | N(4)-C(26)  | 1.435(4)   |
|    | N(5)-C(23)  | 1.385(4)   |
|    | N(5)-C(24)  | 1.398(4)   |
|    | N(5)-C(35)  | 1.427(4)   |
| 20 | N(6)-C(35)  | 1.259(4)   |
|    | N(6)-C(37)  | 1.429(5)   |
|    | C(2)-C(3)   | 1.328(5)   |
|    | C(4)-C(5)   | 1.398(5)   |
|    | C(4)-C(9)   | 1.399(5)   |
| 25 | C(5)-C(6)   | 1.388(5)   |
|    | C(5)-C(10)  | 1.516(5)   |
|    | C(6)-C(7)   | 1.393(6)   |
|    | C(7)-C(8)   | 1.381(6)   |
|    | C(7)-C(11)  | 1.527(5)   |
| 30 | C(8)-C(9)   | 1.408(5)   |
|    | C(9)-C(12)  | 1.494(5)   |
|    | C(13)-C(14) | 1.493(5)   |
|    | C(15)-C(20) | 1.399(5)   |
|    | C(15)-C(16) | 1.401(5)   |
| 35 | C(16)-C(17) | 1.398(5)   |

|    |                   |            |
|----|-------------------|------------|
|    | C(16)-C(21)       | 1.492(6)   |
|    | C(17)-C(18)       | 1.371(6)   |
|    | C(18)-C(19)       | 1.388(6)   |
|    | C(19)-C(20)       | 1.391(5)   |
| 5  | C(20)-C(22)       | 1.516(6)   |
|    | C(24)-C(25)       | 1.339(5)   |
|    | C(26)-C(27)       | 1.393(5)   |
|    | C(26)-C(31)       | 1.398(5)   |
|    | C(27)-C(28)       | 1.405(5)   |
| 10 | C(27)-C(32)       | 1.500(5)   |
|    | C(28)-C(29)       | 1.384(5)   |
|    | C(29)-C(30)       | 1.384(5)   |
|    | C(29)-C(33)       | 1.521(5)   |
|    | C(30)-C(31)       | 1.391(5)   |
| 15 | C(31)-C(34)       | 1.523(5)   |
|    | C(35)-C(36)       | 1.491(5)   |
|    | C(37)-C(42)       | 1.389(6)   |
|    | C(37)-C(38)       | 1.403(6)   |
|    | C(38)-C(39)       | 1.397(6)   |
| 20 | C(38)-C(44)       | 1.496(6)   |
|    | C(39)-C(40)       | 1.383(7)   |
|    | C(40)-C(41)       | 1.379(7)   |
|    | C(41)-C(42)       | 1.386(6)   |
|    | C(42)-C(43)       | 1.509(6)   |
| 25 | Cl(7)-C(3S)       | 1.737(5)   |
|    | Cl(6)-C(3S)       | 1.760(5)   |
|    | Cl(2)-C(1S)       | 1.732(5)   |
|    | Cl(3)-C(1S)       | 1.761(5)   |
|    | Cl(4)-C(2S)       | 1.720(5)   |
| 30 | Cl(5)-C(2S)       | 1.757(5)   |
|    | C(23)-Cu(1)-C(1)  | 155.34(14) |
|    | C(23)-Cu(1)-Cl(1) | 99.29(10)  |
|    | C(1)-Cu(1)-Cl(1)  | 105.35(10) |
| 35 | C(1)-N(1)-C(3)    | 112.6(3)   |
|    | C(1)-N(1)-C(4)    | 126.0(3)   |

|    |                   |          |
|----|-------------------|----------|
|    | C(3)-N(1)-C(4)    | 121.4(3) |
|    | C(1)-N(2)-C(2)    | 111.1(3) |
|    | C(1)-N(2)-C(13)   | 127.4(3) |
|    | C(2)-N(2)-C(13)   | 121.5(3) |
| 5  | C(13)-N(3)-C(15)  | 122.6(3) |
|    | C(23)-N(4)-C(25)  | 112.3(3) |
|    | C(23)-N(4)-C(26)  | 124.6(3) |
|    | C(25)-N(4)-C(26)  | 122.9(3) |
|    | C(23)-N(5)-C(24)  | 111.6(3) |
| 10 | C(23)-N(5)-C(35)  | 126.5(3) |
|    | C(24)-N(5)-C(35)  | 121.9(3) |
|    | C(35)-N(6)-C(37)  | 122.5(3) |
|    | N(1)-C(1)-N(2)    | 102.9(3) |
|    | N(1)-C(1)-Cu(1)   | 123.7(2) |
| 15 | N(2)-C(1)-Cu(1)   | 132.9(3) |
|    | C(3)-C(2)-N(2)    | 107.0(3) |
|    | C(2)-C(3)-N(1)    | 106.4(3) |
|    | C(5)-C(4)-C(9)    | 123.1(3) |
|    | C(5)-C(4)-N(1)    | 118.3(3) |
| 20 | C(9)-C(4)-N(1)    | 118.6(3) |
|    | C(6)-C(5)-C(4)    | 117.7(3) |
|    | C(6)-C(5)-C(10)   | 121.5(4) |
|    | C(4)-C(5)-C(10)   | 120.8(3) |
|    | C(5)-C(6)-C(7)    | 121.6(4) |
| 25 | C(8)-C(7)-C(6)    | 118.8(3) |
|    | C(8)-C(7)-C(11)   | 120.7(4) |
|    | C(6)-C(7)-C(11)   | 120.4(4) |
|    | C(7)-C(8)-C(9)    | 122.5(4) |
|    | C(4)-C(9)-C(8)    | 116.2(3) |
| 30 | C(4)-C(9)-C(12)   | 122.4(3) |
|    | C(8)-C(9)-C(12)   | 121.4(3) |
|    | N(3)-C(13)-N(2)   | 115.3(3) |
|    | N(3)-C(13)-C(14)  | 128.1(3) |
|    | N(2)-C(13)-C(14)  | 116.6(3) |
| 35 | C(20)-C(15)-C(16) | 121.0(3) |
|    | C(20)-C(15)-N(3)  | 120.2(3) |



|    |                   |          |
|----|-------------------|----------|
|    | C(16)-C(15)-N(3)  | 118.2(3) |
|    | C(17)-C(16)-C(15) | 118.3(4) |
|    | C(17)-C(16)-C(21) | 120.8(4) |
|    | C(15)-C(16)-C(21) | 120.8(3) |
| 5  | C(18)-C(17)-C(16) | 121.3(4) |
|    | C(17)-C(18)-C(19) | 119.8(4) |
|    | C(18)-C(19)-C(20) | 121.0(4) |
|    | C(19)-C(20)-C(15) | 118.6(4) |
|    | C(19)-C(20)-C(22) | 120.6(4) |
| 10 | C(15)-C(20)-C(22) | 120.8(3) |
|    | N(4)-C(23)-N(5)   | 102.8(3) |
|    | N(4)-C(23)-Cu(1)  | 124.2(2) |
|    | N(5)-C(23)-Cu(1)  | 132.5(3) |
|    | C(25)-C(24)-N(5)  | 106.3(3) |
| 15 | C(24)-C(25)-N(4)  | 107.1(3) |
|    | C(27)-C(26)-C(31) | 122.1(3) |
|    | C(27)-C(26)-N(4)  | 118.0(3) |
|    | C(31)-C(26)-N(4)  | 119.9(3) |
|    | C(26)-C(27)-C(28) | 117.7(3) |
| 20 | C(26)-C(27)-C(32) | 121.4(3) |
|    | C(28)-C(27)-C(32) | 120.9(3) |
|    | C(29)-C(28)-C(27) | 121.6(4) |
|    | C(28)-C(29)-C(30) | 118.9(3) |
|    | C(28)-C(29)-C(33) | 120.3(4) |
| 25 | C(30)-C(29)-C(33) | 120.7(3) |
|    | C(29)-C(30)-C(31) | 121.8(3) |
|    | C(30)-C(31)-C(26) | 117.9(3) |
|    | C(30)-C(31)-C(34) | 121.2(3) |
|    | C(26)-C(31)-C(34) | 120.9(3) |
| 30 | N(6)-C(35)-N(5)   | 115.7(3) |
|    | N(6)-C(35)-C(36)  | 127.3(3) |
|    | N(5)-C(35)-C(36)  | 117.0(3) |
|    | C(42)-C(37)-C(38) | 121.5(4) |
|    | C(42)-C(37)-N(6)  | 118.7(3) |
| 35 | C(38)-C(37)-N(6)  | 119.4(4) |
|    | C(39)-C(38)-C(37) | 117.7(4) |

|    |                   |          |
|----|-------------------|----------|
|    | C(39)-C(38)-C(44) | 121.9(4) |
|    | C(37)-C(38)-C(44) | 120.4(4) |
|    | C(40)-C(39)-C(38) | 121.3(4) |
|    | C(41)-C(40)-C(39) | 119.6(4) |
| 5  | C(40)-C(41)-C(42) | 121.2(4) |
|    | C(41)-C(42)-C(37) | 118.7(4) |
|    | C(41)-C(42)-C(43) | 121.0(4) |
|    | C(37)-C(42)-C(43) | 120.3(4) |
|    | Cl(2)-C(1S)-Cl(3) | 113.3(3) |
| 10 | Cl(4)-C(2S)-Cl(5) | 113.0(3) |
|    | Cl(7)-C(3S)-Cl(6) | 111.9(3) |

---

Symmetry transformations used to generate equivalent atoms:

15

**Table 14.** Anisotropic displacement parameters ( $\text{\AA}^2 \times 10^3$ ) for k09221. The anisotropic displacement factor exponent takes the form:  $-2p^2 [ h^2 a^{*2} U^{11} + \dots + 2 h k a^* b^* U^{12} ]$

|    |       | U11   | U22   | U33   | U23   | U13   | U12   |
|----|-------|-------|-------|-------|-------|-------|-------|
| 5  | Cu(1) | 24(1) | 23(1) | 30(1) | 9(1)  | -2(1) | 2(1)  |
|    | Cl(1) | 40(1) | 37(1) | 58(1) | 12(1) | 3(1)  | 20(1) |
|    | N(1)  | 23(1) | 25(1) | 27(2) | 8(1)  | -1(1) | 3(1)  |
|    | N(2)  | 25(1) | 24(1) | 26(2) | 7(1)  | 0(1)  | 5(1)  |
| 10 | N(3)  | 33(2) | 28(2) | 25(2) | 9(1)  | 0(1)  | 8(1)  |
|    | N(4)  | 28(1) | 27(2) | 30(2) | 10(1) | 2(1)  | 5(1)  |
|    | N(5)  | 26(1) | 22(1) | 27(2) | 7(1)  | -1(1) | 4(1)  |
|    | N(6)  | 31(2) | 27(2) | 33(2) | 10(1) | 0(1)  | 3(1)  |
|    | C(1)  | 25(2) | 21(2) | 29(2) | 8(1)  | 2(1)  | 6(1)  |
| 15 | C(2)  | 26(2) | 24(2) | 31(2) | 9(2)  | -4(1) | -3(1) |
|    | C(3)  | 25(2) | 29(2) | 32(2) | 8(2)  | -5(2) | 0(2)  |
|    | C(4)  | 24(2) | 29(2) | 27(2) | 12(2) | -3(1) | 5(1)  |
|    | C(5)  | 28(2) | 31(2) | 31(2) | 6(2)  | -2(2) | 7(2)  |
|    | C(6)  | 35(2) | 43(2) | 29(2) | 8(2)  | 2(2)  | 6(2)  |
| 20 | C(7)  | 34(2) | 45(2) | 33(2) | 20(2) | -3(2) | 6(2)  |
|    | C(8)  | 34(2) | 33(2) | 49(3) | 17(2) | -1(2) | 10(2) |
|    | C(9)  | 28(2) | 31(2) | 36(2) | 12(2) | 0(2)  | 7(2)  |
|    | C(10) | 51(2) | 41(2) | 41(2) | 5(2)  | 10(2) | 20(2) |
|    | C(11) | 58(3) | 65(3) | 52(3) | 37(2) | 9(2)  | 16(2) |
| 25 | C(12) | 43(2) | 35(2) | 49(3) | 11(2) | 12(2) | 17(2) |
|    | C(13) | 28(2) | 22(2) | 24(2) | 6(1)  | 0(1)  | 6(1)  |
|    | C(14) | 32(2) | 30(2) | 34(2) | 12(2) | -5(2) | 3(2)  |
|    | C(15) | 24(2) | 28(2) | 28(2) | 10(2) | -2(1) | 3(1)  |
|    | C(16) | 36(2) | 31(2) | 39(2) | 14(2) | 5(2)  | 11(2) |
| 30 | C(17) | 43(2) | 33(2) | 43(2) | 17(2) | 3(2)  | 15(2) |
|    | C(18) | 41(2) | 43(2) | 37(2) | 21(2) | -1(2) | 10(2) |
|    | C(19) | 40(2) | 45(2) | 30(2) | 9(2)  | 3(2)  | 13(2) |
|    | C(20) | 32(2) | 34(2) | 32(2) | 9(2)  | -3(2) | 8(2)  |
|    | C(21) | 79(3) | 45(2) | 51(3) | 19(2) | 21(2) | 33(2) |
| 35 | C(22) | 53(2) | 43(2) | 40(2) | 6(2)  | 3(2)  | 21(2) |

|    |       |       |        |        |       |        |       |
|----|-------|-------|--------|--------|-------|--------|-------|
|    | C(23) | 24(2) | 28(2)  | 31(2)  | 10(2) | 1(1)   | 10(1) |
|    | C(24) | 27(2) | 23(2)  | 36(2)  | 6(2)  | -1(2)  | -1(1) |
|    | C(25) | 32(2) | 25(2)  | 31(2)  | 3(2)  | -5(2)  | -2(2) |
|    | C(26) | 31(2) | 24(2)  | 27(2)  | 8(1)  | -1(1)  | 5(1)  |
| 5  | C(27) | 28(2) | 30(2)  | 33(2)  | 9(2)  | 0(2)   | 7(2)  |
|    | C(28) | 36(2) | 34(2)  | 32(2)  | 8(2)  | -6(2)  | 12(2) |
|    | C(29) | 38(2) | 33(2)  | 25(2)  | 5(2)  | 2(2)   | 9(2)  |
|    | C(30) | 35(2) | 35(2)  | 36(2)  | 7(2)  | 8(2)   | 12(2) |
|    | C(31) | 34(2) | 27(2)  | 30(2)  | 4(2)  | 1(2)   | 10(2) |
| 10 | C(32) | 37(2) | 52(2)  | 48(3)  | 20(2) | 6(2)   | 22(2) |
|    | C(33) | 50(2) | 51(2)  | 36(2)  | 22(2) | 4(2)   | 14(2) |
|    | C(34) | 53(2) | 46(2)  | 56(3)  | 16(2) | 8(2)   | 29(2) |
|    | C(35) | 26(2) | 26(2)  | 32(2)  | 7(2)  | 0(1)   | 10(2) |
|    | C(36) | 33(2) | 30(2)  | 30(2)  | 8(2)  | -2(2)  | 2(2)  |
| 15 | C(37) | 32(2) | 29(2)  | 26(2)  | 7(2)  | -3(2)  | -1(2) |
|    | C(38) | 41(2) | 32(2)  | 36(2)  | 9(2)  | -4(2)  | 2(2)  |
|    | C(39) | 56(3) | 44(2)  | 37(2)  | 18(2) | -6(2)  | 8(2)  |
|    | C(40) | 55(3) | 56(3)  | 29(2)  | 10(2) | 2(2)   | 4(2)  |
|    | C(41) | 44(2) | 63(3)  | 36(2)  | 6(2)  | 5(2)   | 15(2) |
| 20 | C(42) | 36(2) | 45(2)  | 32(2)  | 5(2)  | -1(2)  | 8(2)  |
|    | C(43) | 59(3) | 84(4)  | 45(3)  | 15(2) | 3(2)   | 41(3) |
|    | C(44) | 60(3) | 61(3)  | 48(3)  | 20(2) | 1(2)   | 29(2) |
|    | CI(7) | 90(1) | 96(1)  | 90(1)  | 41(1) | 12(1)  | 49(1) |
|    | CI(6) | 77(1) | 128(1) | 64(1)  | 8(1)  | -5(1)  | 65(1) |
| 25 | CI(2) | 67(1) | 53(1)  | 111(1) | 17(1) | -28(1) | 15(1) |
|    | CI(3) | 71(1) | 52(1)  | 54(1)  | 10(1) | -8(1)  | 18(1) |
|    | C(1S) | 49(2) | 61(3)  | 57(3)  | 16(2) | -3(2)  | 21(2) |
|    | CI(4) | 93(1) | 52(1)  | 162(2) | 16(1) | -58(1) | 22(1) |
|    | CI(5) | 56(1) | 45(1)  | 78(1)  | 19(1) | 15(1)  | 23(1) |
| 30 | C(2S) | 65(3) | 40(2)  | 88(4)  | 9(3)  | -6(3)  | 21(2) |
|    | C(3S) | 60(3) | 66(3)  | 62(3)  | 11(3) | -2(2)  | 29(2) |

---

**Table 15.** Hydrogen coordinates ( $\times 10^4$ ) and isotropic displacement parameters ( $\text{\AA}^2 \times 10^3$ ) for k09221.

|    | x      | y     | z     | U(eq) |    |
|----|--------|-------|-------|-------|----|
| 5  |        |       |       |       |    |
|    | H(2A)  | 2996  | 809   | 2126  | 38 |
|    | H(3A)  | 3292  | 1966  | 1306  | 40 |
|    | H(6A)  | 7022  | 4641  | 177   | 47 |
| 10 | H(8A)  | 5807  | 7149  | 1077  | 48 |
|    | H(10A) | 6815  | 2689  | 1183  | 67 |
|    | H(10B) | 7017  | 2761  | 530   | 67 |
|    | H(10C) | 5554  | 1941  | 726   | 67 |
|    | H(11A) | 7383  | 6627  | -160  | 90 |
| 15 | H(11B) | 7551  | 7866  | 308   | 90 |
|    | H(11C) | 6158  | 6986  | -63   | 90 |
|    | H(12A) | 5214  | 5731  | 2282  | 63 |
|    | H(12B) | 3854  | 5269  | 1901  | 63 |
|    | H(12C) | 4983  | 6793  | 1974  | 63 |
| 20 | H(14A) | 6341  | 2415  | 3653  | 53 |
|    | H(14B) | 6395  | 3740  | 3458  | 53 |
|    | H(14C) | 7047  | 2900  | 3098  | 53 |
|    | H(17A) | 3986  | -2103 | 4066  | 47 |
|    | H(18A) | 3466  | -1146 | 4884  | 51 |
| 25 | H(19A) | 3261  | 838   | 4909  | 48 |
|    | H(21A) | 4281  | -2251 | 3102  | 83 |
|    | H(21B) | 5251  | -807  | 2953  | 83 |
|    | H(21C) | 3691  | -1495 | 2749  | 83 |
|    | H(22A) | 3035  | 2468  | 4447  | 68 |
| 30 | H(22B) | 2949  | 2264  | 3775  | 68 |
|    | H(22C) | 4367  | 3115  | 4130  | 68 |
|    | H(24A) | 11544 | 9468  | 2920  | 40 |
|    | H(25A) | 10784 | 8827  | 3840  | 42 |
|    | H(28A) | 8860  | 4394  | 4617  | 42 |
| 35 | H(30A) | 6084  | 5754  | 4576  | 44 |

|    |        |       |       |      |    |
|----|--------|-------|-------|------|----|
|    | H(32A) | 11100 | 6396  | 3857 | 66 |
|    | H(32B) | 10147 | 5155  | 3390 | 66 |
|    | H(32C) | 10538 | 4894  | 3986 | 66 |
|    | H(33A) | 6379  | 4721  | 5391 | 71 |
| 5  | H(33B) | 7353  | 4017  | 5344 | 71 |
|    | H(33C) | 5955  | 3338  | 4970 | 71 |
|    | H(34A) | 7570  | 8119  | 3714 | 73 |
|    | H(34B) | 6203  | 7345  | 3992 | 73 |
|    | H(34C) | 6411  | 6755  | 3376 | 73 |
| 10 | H(36A) | 9308  | 6564  | 1202 | 52 |
|    | H(36B) | 8185  | 6421  | 1629 | 52 |
|    | H(36C) | 9066  | 5633  | 1674 | 52 |
|    | H(39A) | 11042 | 10167 | 256  | 59 |
|    | H(40A) | 12695 | 9599  | -82  | 65 |
| 15 | H(41A) | 13530 | 8507  | 443  | 61 |
|    | H(43A) | 13551 | 7468  | 1221 | 88 |
|    | H(43B) | 12159 | 6832  | 1498 | 88 |
|    | H(43C) | 13334 | 8242  | 1791 | 88 |
|    | H(44A) | 9023  | 8936  | 1271 | 81 |
| 20 | H(44B) | 9530  | 10181 | 936  | 81 |
|    | H(44C) | 10141 | 10380 | 1566 | 81 |
|    | H(1SA) | 11255 | 3963  | 2658 | 67 |
|    | H(1SB) | 12344 | 3581  | 2365 | 67 |
|    | H(2SA) | 7422  | 911   | 2591 | 79 |
| 25 | H(2SB) | 8530  | 1076  | 2155 | 79 |
|    | H(3SA) | 9476  | 2310  | 742  | 75 |
|    | H(3SB) | 9508  | 3349  | 1278 | 75 |

---

## References

- 1 R. T. Boere; V. Klassen; G. Wolmershauser. *J. Chem. Soc., Dalton Trans.*, **1998**, 4147-4154.
  - 2 B. E. Ketz; A. P. Cole; R. M. Waymouth. *Organometallics*, **2004**, 23, 2835-2837.
  - 5 3 Otwinowski; Z.; Minor; W. *Processing of x-ray diffraction data collected in oscillation mode.*; Academic Press: London, 1997; **276 (Macromolecular Crystallography, Part A)**; pp 307-326.
  - 4 R. H. Blessing. *Acta Crystallogr., Sect. A: Found. Crystallogr.*, **1995**, A51, 33-38.
  - 5 G. M. Sheldrick. *Acta Crystallogr., Sect. A: Found. Crystallogr.*, **2008**, A64, 112-122.
- 10
